# Supplementary material
Source: Springer Nature journal article supplement (https://www.springermedizin.de/resource/supplementary/12877_2011_699_MOESM1_ESM.pdf/9440022)

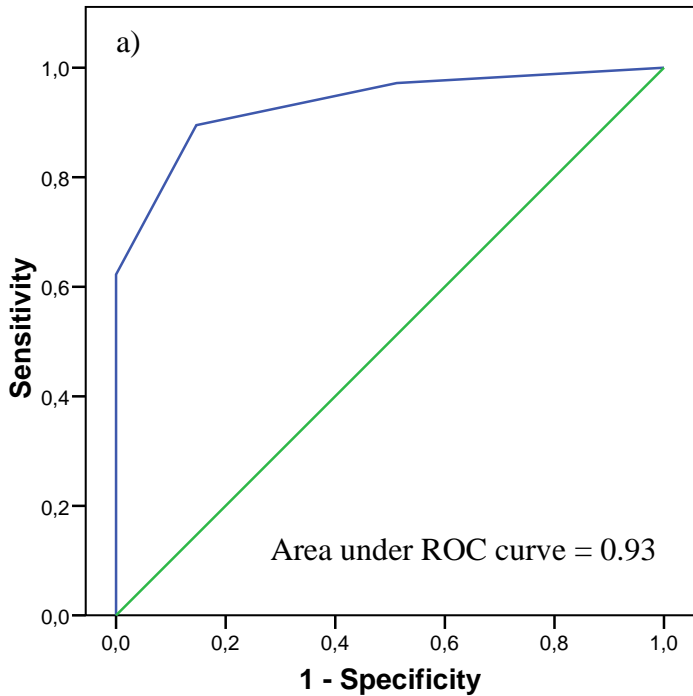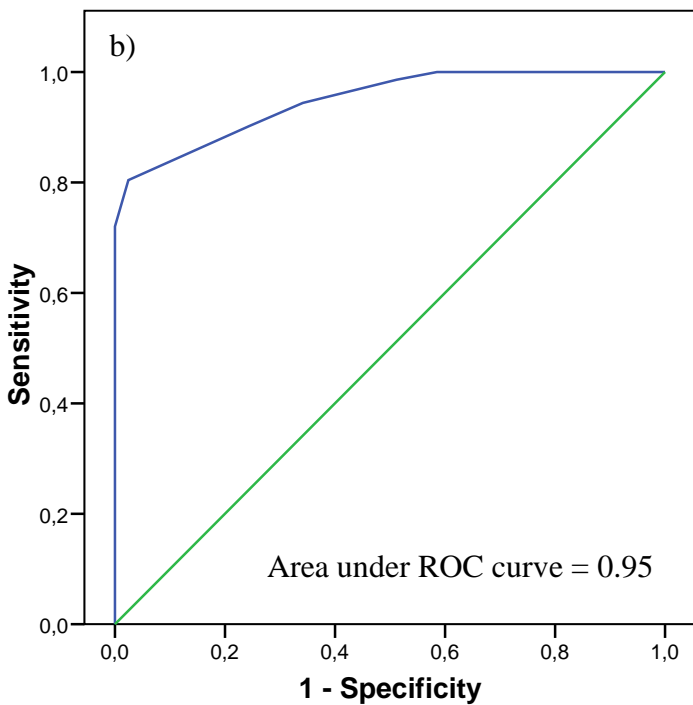

Supplement: MOESM1 [file 9440022]
